# Supplementary material for: Effect of N and NPSB Fertilizer Rates on Growth, Yield and Yield Components of tef (Eragrostis tef (Zucc.)Trotter) Varieties in Gechi District, Southwestern Ethiopia
Source: Research Square preprint supplement (doi:10.21203/rs.3.rs-6546186/v1), 2025-06-09
Supplement: Supplementary file 1 [file b95d5819308f05744007f80e.docx]

# Supplementary Materials

**Table 1**:Days to 50% flowering and 90% physiological maturity, plant height, panicle length, total number of tillers, productive tillers plant-1 and lodging percentage influenced by fertilizer and tef variety

| Source of variation | Mean Squares of Traits | | | | | | | |
| --- | --- | --- | --- | --- | --- | --- | --- | --- |
| DF | DF | PM | PH | PL | TNT | PT | LP |
| Variety (V) | 2 | 792.72** | 663.68** | 487.21** | 58.39** | 25.11** | 25.57** | 602.07** |
| Fertilizer rate (F) | 5 | 62.38** | 217.97** | 622.74** | 79.14** | 9.44** | 5.78** | 291.48** |
| V*F | 10 | 6.41ns | 7.39ns | 28.03** | 4.51** | 1.07** | 0.91** | 9.45* |
| Rep | 2 | 25.16ns | 143.68****** | 230.0** | 35.16** | 2.22** | 1.18* | 107.85** |
| Error | 34 | 15.69 | 5.52 | 6.40 | 1.04 | 0.16 | 0.26 | 3.59 |

*DF=Degree of freedom, DF=Days of flowering, PM=Physiological maturity, PH= Plant height, PL=Panicle length, TNT=Total number of tillers, PT= Productive tillers and LP=Lodging Percentage*

**2**: Grain, straw and total above ground dry biomass yield, thousand seed weight and harvest index as influenced by fertilizer and tef variety

| Source of variation | DF | Mean Squares of Traits | | | | |
| --- | --- | --- | --- | --- | --- | --- |
| GY | SY | TAGDBY | TSW | HI |
| Variety (V) | 2 | 2810873.22** | 5348256.10** | 15909583.53** | 0.0043** | 105.77** |
| Fertilizer rate (F) | 5 | 1624596.88** | 2681967.86** | 8371517.24** | 0.0043** | 108.13** |
| V*F | 10 | 102883.02** | 254616.65** | 644544.89** | 0.00021** | 3.32ns |
| Rep | 2 | 224949.50** | 200378.20** | 809535.05** | 0.0024** | 15.75** |
| Error | 34 | 20740.84 | 35491.30 | 86603.34 | 0.000095 | 1.97 |

*DF=Degree of freedom, GY=Grain yield, SY=Straw yield, TAGDBY=Total above ground dry biomass yield, TSW=Thousand seed weight, HI=Harvest index*

**Table 3**: Pearson correlation coefficients, showing an association among grain and straw yield of tef

| Traits | DF | PM | PH | PL | TNT | PT | LP | GY | SY | TAGDBY | TSW | HI |
| --- | --- | --- | --- | --- | --- | --- | --- | --- | --- | --- | --- | --- |
| DF | 1 |  |  |  |  |  |  |  |  |  |  |  |
| PM | 0.75** | 1 |  |  |  |  |  |  |  |  |  |  |
| PH | -0.01ns | -0.39** | 1 |  |  |  |  |  |  |  |  |  |
| PL | -0.007ns | -0.38** | 0.99** | 1 |  |  |  |  |  |  |  |  |
| TNT | 0.21ns | -0.08ns | 0.82** | 0.81** | 1 |  |  |  |  |  |  |  |
| PT | 0.30* | 0.006ns | 0.77** | 0.75** | 0.97** | 1 |  |  |  |  |  |  |
| LP | -0.59** | -0.70** | 0.29* | 0.31* | 0.03ns | -0.08ns | 1 |  |  |  |  |  |
| GY | 0.14ns | -0.14ns | 0.88** | 0.86** | 0.93** | 0.91** | -0.30* | 1 |  |  |  |  |
| SY | 0.16ns | -0.12ns | 0.84** | 0.83** | 0.88** | 0.86** | 0.11ns | 0.95** | 1 |  |  |  |
| TAGDBY | 0.16ns | -0.12ns | 0.87** | 0.86** | 0.92** | 0.89** | 0.12ns | 0.97** | 0.99** | 1 |  |  |
| TSW | 0.06ns | -0.31* | 0.84** | 0.83** | 0.79** | 0.71** | 0.30* | 0.80** | 0.76** | 0.78** | 1 |  |
| HI | 0.10ns | -0.17ns | 0.80** | 0.78** | 0.90** | 0.85** | 0.23** | 0.93** | 0.80** | 0.86** | 0.81** | 1 |

*DF: Date of flowering, PM: Physiological maturity, PH: plant height, PL: Panicle length, TN: Number of tillers plant-1, PT: Productive tillers, LP: Lodging percentage, GY: Grain yield, SY=Straw yield, TAGDBY: Total above ground dry biomass yield, TSW: Thousand seed weight, HI: Harvest index, NS: Non-significant,*: Correlation is significant at the 0.05 level, **: Correlation is significant at the 0.01 level.*
